# Supplementary material
Source: PubMed Central journal article supplement (PMC2762196)
Supplement: NIHMS126212-supplement-supplement_1.pdf [file NIHMS126212-supplement-supplement_1.pdf]

## Supplementary Figures and Tables:

**Supplementary Figure I. Microarray analysis of transcriptional response to interferon- $\gamma$  in human lesion-derived cells (LDC) *in vitro*.** Human LDC were treated with IFN $\gamma$  (5 ng/mL) for 24 hours prior to total RNA harvest and transcript profiling on Affymetrix U133A GeneChips. Each point indicates the average expression level (log scale) of a single transcript under control (X-axis) or IFN $\gamma$  treatment (Y-axis). The center black line indicates no change, and the outer red lines reflect a two-fold change in gene expression (n=3 per group; 22,283 transcripts measured). Select transcripts are labeled.

**Supplementary Table I. Primers used for qRT-PCR validation of microarray results.** Primer sequences are listed for a series of candidate interferon-response genes, as well as for a small set of apoptosis-related transcripts that were not identified in the microarray analysis.

**Supplementary Table II. Antibodies used for Western blot validation of microarray results.** Antibody types, sources, and catalog numbers are listed for candidate interferon-response genes, and for additional targets related to apoptosis pathways not identified in the microarray analysis.

**Supplementary Table III. Microarray profiling of interferon $\gamma$ -regulated messages in lesion cells.** Microarray analysis identified 135 transcripts upregulated by IFN $\gamma$  in LDC. Using informatic tools, the list was narrowed to 72 transcripts, including some that were not altered transcriptionally, but were closely related to regulated transcripts (i.e. FAP, FAS). Systematic name (Affymetrix ID), fold change after IFN $\gamma$  treatment, Common name, Genbank accession, and Full Description are listed for each. These transcripts were systematically followed by qRT-PCR, expression in IRF-1 overexpressing cells, which are not sensitized to apoptosis, Western blots, small molecule inhibitors, retroviral overexpression, and siRNA knockdown. Yes (green) indicates the results would be consistent with a possible role for the candidate, No (red) indicates the result is not

consistent with a role for that candidate, +/- (yellow) indicates an intermediate result. Indeterminate results, such as failure to amplify a PCR product successfully, or a non-reactive Western blot are indicated by neg (red).
